# Supplementary material
Source: PubMed Central journal article supplement (PMC3067155)
Supplement: AAC.01540-10_1.pdf [file AAC.01540-10_1.pdf]

# Supplemental FIG. 1

|                                        | 10         | 20         | 30         | 40           | 50          | 60         | 70         | 80         | 90          | 99        |
|----------------------------------------|------------|------------|------------|--------------|-------------|------------|------------|------------|-------------|-----------|
| pNL4-3 PR                              | PQITLWQRPL | VTIKIGGQLK | EALLDTGADD | TVLEEMNLPG   | RWKPKMIGGI  | GGFIKVRQYD | QILIEICGHK | AIGTVLVGPT | PVNIIGRNLL  | TQIGCTLNF |
| HIV <sub>RTV</sub> <sup>WK6</sup>      | .....      | .....      | .....      | .....        | .....X..... | .....      | .....      | .....      | .....A..... | .....     |
| HIV <sub>RTV</sub> <sup>WK18</sup>     | .....F     | .....      | .....      | .....        | .....L..... | ...V.....  | .....      | .....      | .....A..... | .....     |
| HIV <sub>APV</sub> <sup>WK8</sup>      | .....      | .....      | .....      | .....        | .....X..... | .....      | .....      | .....      | .....       | .....     |
| HIV <sub>APV</sub> <sup>WK14</sup>     | .....      | .....      | .....      | .....        | .....L..... | .....      | .....      | .....      | .....       | .....     |
| HIV <sub>APV</sub> <sup>WK20</sup>     | .....F     | .....      | .....      | .....I.....  | .....L..... | .....      | .....      | .....      | .....       | .....     |
| HIV <sub>APV</sub> <sup>WK26</sup>     | .....F     | .....      | .....      | .....IF..... | .....L..... | ...M.....  | .....      | V.....     | .....       | .....     |
| HIV <sub>DRV</sub> <sup>WK7</sup>      | .....      | .....      | .....      | .....        | .....       | .....      | .....      | .....      | .....       | .....     |
| HIV <sub>DRV</sub> <sup>WK14</sup>     | .....      | .....      | .....      | .....        | .....       | .....      | .....      | .....      | .....I..... | .....     |
| HIV <sub>DRV</sub> <sup>WK42</sup>     | .....      | .....      | .....      | .....        | .....       | .....      | .....      | .....      | .....I..... | .....     |
| HIV <sub>1388</sub> <sup>WK20</sup>    | .....      | .....      | .....      | .....        | .....       | .....      | .....      | .....      | .....       | .....     |
| HIV <sub>1388</sub> <sup>WK45</sup>    | .....      | .....      | .....      | .....        | .....       | .....      | .....      | .....      | .....       | .....     |
| HIV <sub>1398</sub> <sup>I-WK10</sup>  | .....      | .....      | .....      | .....        | .....       | .....      | .....      | .....      | .....       | .....     |
| HIV <sub>1398</sub> <sup>I-WK20</sup>  | .....      | .....      | .....      | .....        | .....       | .....      | .....      | .....      | .....       | .....     |
| HIV <sub>1398</sub> <sup>I-WK26</sup>  | .....F     | .....      | .....      | .....        | .....X...V  | .....      | .....      | .....      | .....       | .....     |
| HIV <sub>1398</sub> <sup>I-WK32</sup>  | .....F     | .....      | .....      | .....        | .....X...V  | .....      | .....      | .....      | .....       | .....     |
| HIV <sub>1398</sub> <sup>I-WK38</sup>  | .....F     | .....      | .....      | .....        | .....X...V  | .....      | .....      | .....      | .....       | .....     |
| HIV <sub>1398</sub> <sup>I-WK45</sup>  | .....F     | .....      | .....      | .....        | .....IV...V | .....      | .....      | X.....     | .....X..... | .....     |
|                                        |            |            |            |              |             |            |            | (A/V)      | (I/V)       |           |
| HIV <sub>1398</sub> <sup>II-WK10</sup> | .....      | .....      | .....      | .....        | .....       | .....      | .....      | .....      | .....       | .....     |
| HIV <sub>1398</sub> <sup>II-WK16</sup> | .....      | .....      | .....      | .....        | .....       | .....      | .....      | .....      | .....       | .....     |
| HIV <sub>1398</sub> <sup>II-WK22</sup> | .....F     | .....      | .....      | .....        | .....       | .....      | .....      | .....      | .....       | .....     |
| HIV <sub>1398</sub> <sup>II-WK28</sup> | .....F     | .....      | .....X..   | .....        | .....X..    | .....      | .....      | .....      | .....       | .....     |
| HIV <sub>1398</sub> <sup>II-WK36</sup> | .....F     | .....      | .....X..   | .....        | .....X..    | .....      | .....      | .....      | .....       | .....     |
| HIV <sub>1398</sub> <sup>II-WK42</sup> | .....F     | .....      | .....X..   | .....        | .....X..    | .....      | .....      | .....      | .....       | .....     |
| HIV <sub>1398</sub> <sup>II-WK49</sup> | .....F     | .....      | .....X..   | .....X..     | .....X..    | .....      | .....      | .....      | .....       | .....     |
|                                        |            |            | (A/S)      | (L/F)        | (M/I)       |            |            |            |             |           |

**Supplemental FIG. 1 Amino acid sequences of protease-encoding regions of HIV-1<sub>NL4-3</sub> variants selected in the presence of DRV, GRL-1388, or GRL-1398.** The amino acid sequence of protease, deduced from the nucleotide sequence of the protease-encoding region of each proviral DNA isolated at each indicated time, is shown. The “WK” number indicated in each HIV-1 denotes the week period of selection. The amino acid sequence of wild-type HIV-1<sub>NL4-3</sub> protease is illustrated at the top as a reference.

## Supplemental FIG. 2

|                                         | 10         | 20         | 30         | 40          | 50                | 60                | 70         | 80         | 90          | 99                 |
|-----------------------------------------|------------|------------|------------|-------------|-------------------|-------------------|------------|------------|-------------|--------------------|
| pNL4-3 PR                               | PQITLWQRPL | VTIKIGGQLK | EALLDTGADD | TVLEEMNLPG  | RWKPKMIGGI        | GGFIKVRQYD        | QILIEICGHK | AIGTVLVGPT | PVNIIGRNLL  | TQIGCTLNF          |
| HIV <sub>MIX-DRV</sub> <sup>WK3</sup>   | .....I     | ...R.....  | .....      | ..I..I....  | .....I....        | ..L.R.....        | .VP.....   | V.S.....   | .A.....M    | ..L..X...<br>(T/A) |
| HIV <sub>MIX-DRV</sub> <sup>WK6</sup>   | .....V     | .E...A..IR | .....      | ..F.DIS...  | .....I..V         | ..LVR.K..E        | .VP.....   | V.....     | .A.....M    | .....              |
| HIV <sub>MIX-DRV</sub> <sup>WK19</sup>  | .....V     | .E...A..IR | .....      | ..IFKDIS... | .....I..V         | ..LVR.K..E        | .VP.....   | V.S.....   | .A.....M    | .....              |
| HIV <sub>MIX-DRV</sub> <sup>WK21</sup>  | .....V     | .E...A..IR | .....      | ..IFKDIS... | .....I..V         | ..LVR.K..E        | .VP.....   | V.S.....   | .A.....M    | .....              |
| HIV <sub>MIX-1388</sub> <sup>WK3</sup>  | .....I     | ...V...R   | ...I.....  | .....I....  | .....L....        | ...V.....         | .VP.....Q  | ..S.....   | .A.....M    | .....              |
| HIV <sub>MIX-1388</sub> <sup>WK6</sup>  | .....V     | .E...A..IR | .....      | ..F.DIS...  | .....I..V         | ..XVX.X..X        | .VP.....X  | X.....     | .A.....XX   | .....              |
|                                         |            |            |            |             | (F/L) (K/R) (R/K) | (D/E) (K/Q) (A/V) |            |            | (L/M) (L/M) |                    |
| HIV <sub>MIX-1388</sub> <sup>WK12</sup> | .....V     | .E...A..IR | .....      | ..F.DIS...  | .....I..V         | ..LVR.K..E        | .VP.....   | V.....     | .A.....M    | .....              |
| HIV <sub>MIX-1388</sub> <sup>WK17</sup> | .....V     | .E...A..IR | .....      | ..XF.DIS... | .....I..V         | ..LVR.K..E        | .VP.....   | V.....     | .A.....M    | .....              |
|                                         |            |            |            | (V/I)       |                   |                   |            |            |             |                    |
| HIV <sub>MIX-1398</sub> <sup>WK3</sup>  | .....I     | ...R.....  | .....      | ..I..I....  | .....I....        | ..L.R.....        | .VP.....   | V.S.....   | .A.....M    | ..L.....           |
| HIV <sub>MIX-1398</sub> <sup>WK6</sup>  | .....I     | ...R.....  | .....      | ..I..I....  | .....I....        | ..L.R.....        | .VP.....   | V.S.....   | .A.....M    | ..L.....           |
| HIV <sub>MIX-1398</sub> <sup>WK12</sup> | .....I     | ...X.....  | .....      | ..I..I....  | .....I....        | ..L.X.X..         | .VP.....   | V.S.....   | .A.....M    | ..L.....           |
|                                         |            | (K/R)      |            |             |                   | (K/R) (R/K)       |            |            |             |                    |
| HIV <sub>MIX-1398</sub> <sup>WK18</sup> | .....I     | ...V.....  | .....      | ..I..I....  | .....I....        | ..L.R.....        | .VP.....   | V.S.....   | .X.....M    | ..L.....           |
|                                         |            |            |            |             |                   |                   |            |            | (V/A)       |                    |
| HIV <sub>MIX-1398</sub> <sup>WK24</sup> | .....I     | ...V.....  | .....X..   | ..I..I....  | .....I..X         | ..L.R.....        | .VP.....   | V.S.....   | .X.....M    | ..L.....           |
|                                         |            |            | (A/S)      |             | (I/V)             |                   |            |            | (V/A)       |                    |
| HIV <sub>MIX-1398</sub> <sup>WK29</sup> | .....I     | ...V.....  | .....X..   | ..I..I....  | .....I..X         | ..L.R.....        | .VP.....   | V.S.....   | .....M      | ..L.....           |
|                                         |            |            | (A/S)      |             | (I/V)             |                   |            |            |             |                    |

**Supplemental FIG. 2. Amino acid sequences of protease-encoding regions of *CL* HIV-1<sub>MIX</sub> variants selected in the presence of DRV, GRL-1388, or GRL-1398.** The amino acid sequence of protease, deduced from the nucleotide sequence of the protease-encoding region of each proviral DNA isolated at each indicated time, is shown. The “WK” number indicated in each HIV-1 denotes the week period of selection. The top line shows the protease sequence of the wild-type pNL4-3 clone.
